# Supplementary material
Source: HighWire-hosted journal article supplement (https://mct.aacrjournals.org/content/suppl/2013/07/26/1535-7163.MCT-13-0095)
Supplement: Figure_5.pdf [file Figure_5.pdf]

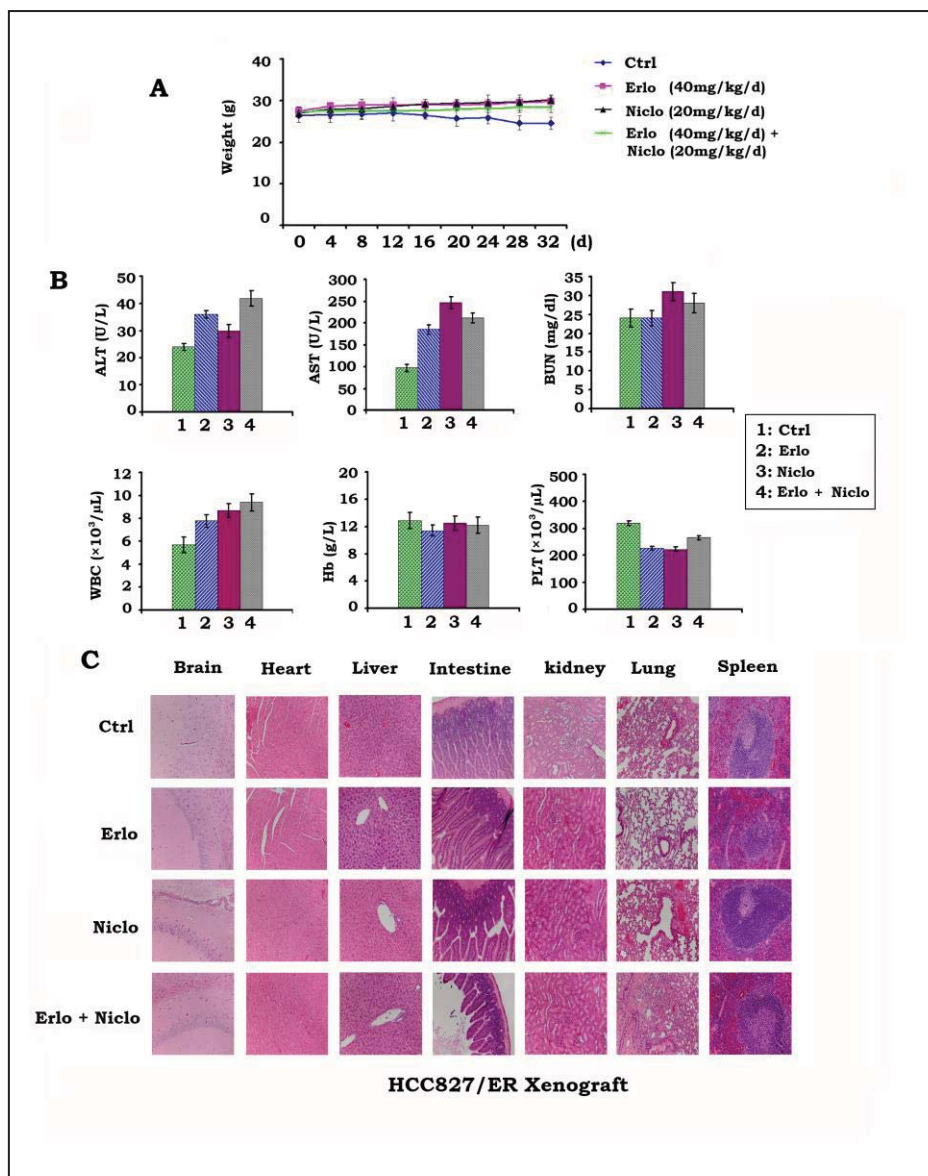

**Figure S5.** Toxicity analysis for treatments with erlotinib and niclosamide in mice bearing HCC827/ER xenografts. *A*, Body weight of mice with HCC827/ER xenografts was measured once every other day during treatment with vehicle control, erlotinib (Erlo, 40mg/kg/d), niclosamide (Niclo, 20mg/kg/d) or in combination. *B*, Blood analysis of mice after various treatments for 32 days. *C*, H&E histology of various organs after various treatments.
